# Supplementary material
Source: publisher figshare collection journal article supplement (https://geolsoc.figshare.com/ndownloader/files/5421695)
Supplement: Supplementary file 1 [file 5421695]

Table 4a. Primary Age Model (Gradstein et al., 2004*) tie-point depths, ages, and errors, and sedimentation rates for each LOC.
Tie-point Ranking	Tie-point Type	Chron/Biostratigraphic event	Chron Depth Top (mbsf)	Chron Depth Base (mbsf)	Chron Depth Midpoint (mbsf)	Depth error (+/-) m	Age (Ma)
Speculative tie-point	Base?	C11n.2n?	178.21	194.16	186.19	7.97	30.217
Speculative tie-point	Base?	C12n?	178.21	194.16	186.19	7.97	31.116
Speculative tie-point	Top?	C12n?	215.74	224.63	220.19	4.44	30.627
Tentative Primary	HO	Reticulofenestra umbilicus (>14 µm)	213.48				31.1
Tentative Primary	HO	Reticulofenestra umbilicus (>14 µm)			214.19	0.71	32
Tentative Primary	HO	Reticulofenestra umbilicus (>14 µm)		214.9			33
Speculative tie-point	Top?	C13n?	215.74	224.63	220.19	4.44	33.266
Primary	Top	C13r	261.92	279.93	270.93	9.01	33.738
Secondary possible	Top	C13n.1n (=C13r [0.31], PŠlike et al., 2006)	288.83	299.18	294.01	5.18	34.066
Secondary possible	Top	C15n	288.83	299.18	294.01	5.18	34.782
Secondary possible	Top	C16n.1n	288.83	299.18	294.01	5.18	35.404
Secondary possible	Base	C13n.1n (=C13r [0.41], PŠlike et al., 2006)	308.68	309.16	308.92	0.24	34.164
Secondary possible	Base	C15n	308.68	309.16	308.92	0.24	35.043
Secondary possible	Base	C16n.1n	308.68	309.16	308.92	0.24	35.567
Primary	Top	C17n.1n	342.35	357.27	349.81	7.46	36.512
Secondary possible	Base	C17n.1n	369.59	386.3	377.95	8.36	37.235
Secondary possible	Base	C17n.2n	369.59	386.3	377.95	8.36	37.549
Secondary possible	Top	C17n.3n	390.75	392.16	391.46	0.71	37.61
Secondary possible	Base	C17n.3n	392.16	393.73	392.95	0.78	37.771
Primary	Top	C18n.1n	397.38	400.49	398.94	1.56	38.032
Secondary possible	Base	C18n.1n	434.77	436.12	435.45	0.68	38.975
Secondary possible	Top	C18n.2n	436.12	437.05	436.59	0.47	39.041
Secondary possible	Base	C18n.1n	446.35	448.65	447.5	1.15	38.975
Secondary possible	Top	C18n.2n	448.65	449.38	449.02	0.37	39.041
Primary	Base	C18n.2n	451.67	453.99	452.83	1.16	39.464
Primary	Top	C19n	480.63	483.39	482.01	1.38	40.439
Primary	Base	C19n	490.27	490.36	490.32	0.05	40.671
Secondary possible	Top	C20n	601.46	606.11	603.79	2.32	41.59
Tentative Primary	Midpoint Age Between Top and Base C20n	C20n	601.46	606.11	603.79	2.32	42.182
Secondary possible	Base	C20n	606.11	608.38	607.25	1.13	42.774
Secondary possible	Top	C21n	601.46	606.11	603.79	2.32	45.346
Secondary possible	Base	C20n	608.38	618.43	613.41	5.02	42.774
Primary	Base	C21n	608.38	618.43	613.41	5.02	47.235
Speculative tie-point	Top?	C22n?	619.55	619.65	619.6	0.05	48.599
Speculative tie-point	Base?	C22n?	640.55	640.6	640.58	0.03	49.427
Speculative tie-point	Top?	C23n.1n?	636.85	636.9	636.88	0.02	50.73
Speculative tie-point	Base?	C23n.2n?	657.1	657.15	657.13	0.02	51.901
Primary	Top	C24n.1n	659.38	686.24	672.81	13.43	52.648
Primary	Base (<)	C24n.3n	696.43	696.43	696.43	0	53.808
* Ages of Chron boundaries from Gradstein et al., 2004 do not include age uncertainties
Primary chron tie-points are used for the primary age model
Tentative primary interpreted chron or biostratigraphic tie-points are used for the primary age model
Secondary possible tie-points are not used in the age model
Speculative tie-points from NRM discrete or from cryomag data are not used in age model
< = younger than, for datum at base of studied section
	Tie-point Top	Tie-point Base	Midpoint LOC Sedimentation rate (m/m.y.)	Top Bounding LOC Sedimentation rate (m/m.y.)	Bottom Bounding LOC Sedimentation rate (m/m.y.)	Maximum Sedimentation rate (m/m.y.)	Minimum Sedimentation rate (m/m.y.)
	HO Reticulofenestra umbilicus (> 14 µm)	Top C13r	32.83	63.07	24.19	86.52	17.49
	Top C13r	Top C17n.1n	28.44	28.99	27.88	34.37	22.5
	Top C17n.1n	Top C18n.1n	32.32	36.2	28.43	38.25	26.39
	Top C18n.1n	Base C18n.2n	37.64	37.91	37.36	39.53	35.74
	Base C18n.2n	Top C19n	29.93	29.7	30.15	32.53	27.32
	Top C19n	Base C19n	35.8	41.55	30.04	41.94	29.66
	Base C19n	Midpoint Age Between Top and Base C20n	75.1	55.08	125.95	126.05	55.04
	Base C21n	Top C24n.1n	10.97	9.42	12.53	14.38	7.57
	Top C24n.1n	Base C24n.3n	20.36	31.94	8.78	31.94	8.78
GRADSTEIN, F.M., OGG, J.G., SMITH, A.G., AGTERBERG, F.P., BLEEKER, W., COOPER, R.A., DAVYDOV, V., GIBBARD, P., HINNOV, L.A., HOUSE, M.R., LOURENS, L., LUTERBACHER, H-P., MCARTHUR, J., MELCHIN, M.J., ROBB, L.J., SHERGOLD, J., VILLENEUVE, M., WARDLAW, B.R., ALI, J., BRINKHUIS, H., HILGEN, F.J., HOOKER, J., HOWARTH, R.J., KNOLL, A.H., LASKAR, J., MONECHI, S., POWELL, J., PLUMB, K.A., RAFI, I., ROEHL…
Table 4b. Primary Age Model (Cande and Kent, 1995*) tie-point depths, ages, and errors, and sedimentation rates for each LOC.
Tie-point Ranking	Tie-point Type	Chron/Biostratigraphic event	Chron Depth Top (mbsf)	Chron Depth Base (mbsf)	Chron Depth Midpoint (mbsf)	Depth error (+/-) m	Age (Ma)
Speculative tie-point	Base?	C11n.2n?	178.21	194.16	186.19	7.97	30.098
Speculative tie-point	Base?	C12n?	178.21	194.16	186.19	7.97	30.939
Speculative tie-point	Top?	C12n?	215.74	224.63	220.19	4.44	30.479
Tentative Primary	HO	Reticulofenestra umbilicus (>14 µm)	213.48				30.9
Tentative Primary	HO	Reticulofenestra umbilicus (>14 µm)			214.19	0.71	31.9
Tentative Primary	HO	Reticulofenestra umbilicus (>14 µm)		214.9			32.8
Speculative tie-point	Top?	C13n?	215.74	224.63	220.19	4.44	33.058
Primary	Top	C13r	261.92	279.93	270.93	9.01	33.545
Secondary possible	Top	C13n.1n (=C13r [0.31], PŠlike et al., 2006)	288.83	299.18	294.01	5.18
Secondary possible	Top	C15n	288.83	299.18	294.01	5.18	34.655
Secondary possible	Top	C16n.1n	288.83	299.18	294.01	5.18	35.343
Secondary possible	Base	C13n.1n (=C13r [0.41], PŠlike et al., 2006)	308.68	309.16	308.92	0.24
Secondary possible	Base	C15n	308.68	309.16	308.92	0.24	34.94
Secondary possible	Base	C16n.1n	308.68	309.16	308.92	0.24	35.526
Primary	Top	C17n.1n	342.35	357.27	349.81	7.46	36.618
Secondary possible	Base	C17n.1n	369.59	386.3	377.95	8.36	37.473
Secondary possible	Base	C17n.2n	369.59	386.3	377.95	8.36	37.848
Secondary possible	Top	C17n.3n	390.75	392.16	391.46	0.71	37.92
Secondary possible	Base	C17n.3n	392.16	393.73	392.95	0.78	38.113
Primary	Top	C18n.1n	397.38	400.49	398.94	1.56	38.426
Secondary possible	Base	C18n.1n	434.77	436.12	435.45	0.68	39.552
Secondary possible	Top	C18n.2n	436.12	437.05	436.59	0.47	39.631
Secondary possible	Base	C18n.1n	446.35	448.65	447.5	1.15	39.552
Secondary possible	Top	C18n.2n	448.65	449.38	449.02	0.37	39.631
Primary	Base	C18n.2n	451.67	453.99	452.83	1.16	39.631
Primary	Top	C19n	480.63	483.39	482.01	1.38	41.257
Primary	Base	C19n	490.27	490.36	490.32	0.05	41.521
Secondary possible	Top	C20n	601.46	606.11	603.79	2.32	42.536
Tentative Primary	Midpoint Age Between Top and Base C20n	C20n	601.46	606.11	603.79	2.32	43.163
Secondary possible	Base	C20n	606.11	608.38	607.25	1.13	43.789
Secondary possible	Top	C21n	601.46	606.11	603.79	2.32	46.264
Secondary possible	Base	C20n	608.38	618.43	613.41	5.02	43.789
Primary	Base	C21n	608.38	618.43	613.41	5.02	47.906
Speculative tie-point	Top?	C22n?	619.55	619.65	619.6	0.05	49.037
Speculative tie-point	Base?	C22n?	640.55	640.6	640.58	0.03	49.714
Speculative tie-point	Top?	C23n.1n?	636.85	636.9	636.88	0.02	50.778
Speculative tie-point	Base?	C23n.2n?	657.1	657.15	657.13	0.02	51.743
Primary	Top	C24n.1n	659.38	686.24	672.81	13.43	52.364
Primary	Base (<)	C24n.3n	696.43	696.43	696.43	0	53.347
* Ages of Chron boundaries from Cande and Kent (1995) do not include age uncertainties
Primary chron tie-points are used for the primary age model
Tentative primary interpreted chron or biostratigraphic tie-points are used for the primary age model
Secondary possible tie-points are not used in the age model
Speculative tie-points from NRM discrete or from cryomag data are not used in age model
< = younger than, for datum at base of studied section
	Tie-point Top	Tie-point Base	Midpoint LOC Sedimentation rate (m/m.y.)	Top Bounding LOC Sedimentation rate (m/m.y.)	Bottom Bounding LOC Sedimentation rate (m/m.y.)	Maximum Sedimentation rate (m/m.y.)	Minimum Sedimentation rate (m/m.y.)
	HO Reticulofenestra umbilicus (> 14 µm)	Top C13r	33.47	65.02	24.59	89.19	17.78
	Top C13r	Top C17n.1n	25.67	26.17	25.17	31.03	20.31
	Top C17n.1n	Top C18n.1n	27.17	30.44	23.9	32.16	22.18
	Top C18n.1n	Base C18n.2n	44.73	45.05	44.4	46.98	42.47
	Base C18n.2n	Top C19n	17.95	17.81	18.08	19.51	16.38
	Top C19n	Base C19n	31.46	36.52	26.4	36.86	26.06
	Base C19n	Midpoint Age Between Top and Base C20n	69.13	51.08	114.04	114.13	51.04
	Base C21n	Top C24n.1n	13.33	11.44	15.21	17.47	9.19
	Top C24n.1n	Base C24n.3n	24.03	37.69	10.37	37.69	10.37
CANDE, S. C., & KENT, D.V. (1995), Revised calibration of the geomagnetic polarity timescale for the Late Cretaceous and Cenozoic. Journal of Geophysical Research, 100, 6093 Ð 6095. doi:10.1029/94JB03098.
